# Supplementary material for: CXCL8/CXCR2 signaling mediates bone marrow fibrosis and is a therapeutic target in myelofibrosis
Source: PubMed Central journal article supplement — Blood. 2023 Apr 5;141(20):2508–19. doi: 10.1182/blood.2022015418 (PMC10273167; doi:10.1182/blood.2022015418), 2023-04-05
Supplement: BLOOD_BLD-2022-015418-mmc1.pdf [file BLOOD_BLD-2022-015418-mmc1.pdf]

# SUPPLEMENTAL FIGURES

## Supplemental Figure 1 – Single-cell RNA-Seq (scRNA-Seq) identifies enrichment in CXCR2 signaling mediators in MF HSPCs

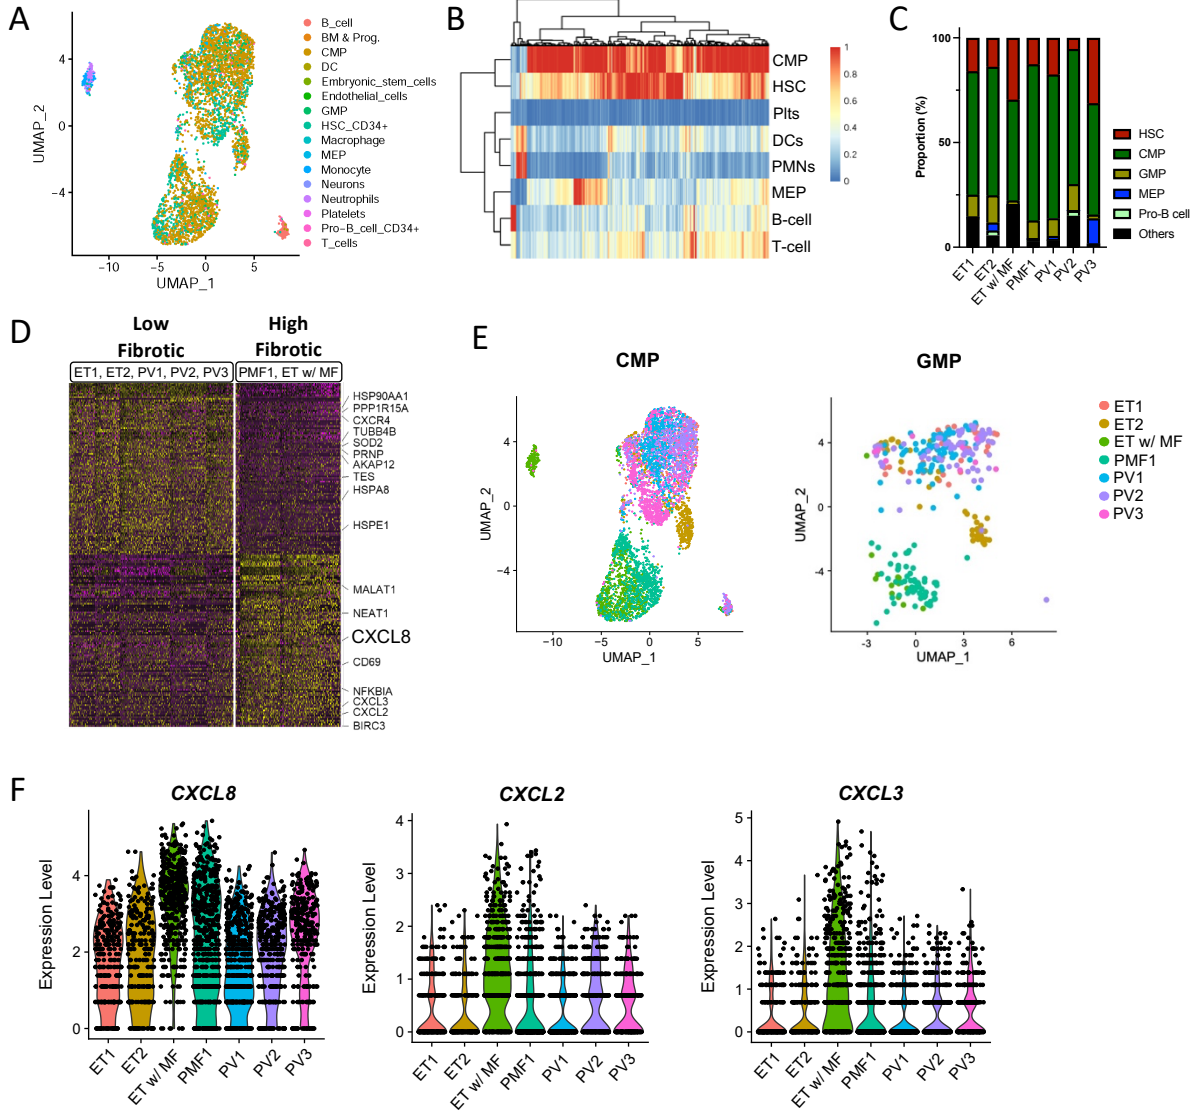

**Supplemental Figure 1: Single-cell RNA-Seq (scRNA-Seq) identifies enrichment in CXCR2 signaling mediators in MF HSPCs. (A)** Uniform manifold approximation and projection (UMAP) demonstrating clustering of detectable cell populations based on single-cell transcriptional profiling. Each dot represents a single cell with color corresponding to cell type (CMP, common myeloid progenitor; DC, dendritic cell; GMP, granulocyte monocyte progenitor; HSC, hematopoietic stem cell; MEP, megakaryocyte erythroid progenitor). **(B)** Hierarchical clustering of detectable cell populations based on transcriptional profiling (CMP, common myeloid progenitor; DC, dendritic cell; Plts: platelets; GMP, granulocyte monocyte progenitor; HSC, hematopoietic stem cell; MEP, megakaryocyte erythroid progenitor; PMN: polymorphonuclear neutrophils). Each hashmark represents a single cell. Colors represent normalized scores. **(C)** Percent frequency of detectable cell populations identified by scRNA-Seq per patient. **(D)** Hierarchical clustering of differentially expressed genes in “low fibrotic” and “high fibrotic” MPN patients. Adjusted p-value <0.01 (Wald test) and abs (log2-fold change) >1. Purple, negative values; yellow, positive values. N=2-5/group. **(E)** UMAPs of common myeloid progenitor (CMP; left panel) and granulocyte-monocyte progenitor (GMP; right panel) populations colored by patient (ET, essential thrombocythemia; PV, polycythemia vera; MF, myelofibrosis). Each dot represents a single cell. **(F)** Violin plots showing relative expression of CXCR2-mediated cytokines *CXCL8* (left panel), *CXCL2* (middle panel), and *CXCL3* (right panel) in CMPs of individual MPN patients by scRNA-Seq. Each dot represents a single cell.

**Supplemental Figure 2 – CXCL8 is aberrantly secreted by MF CD34+ cells and correlates with clinical parameters.**

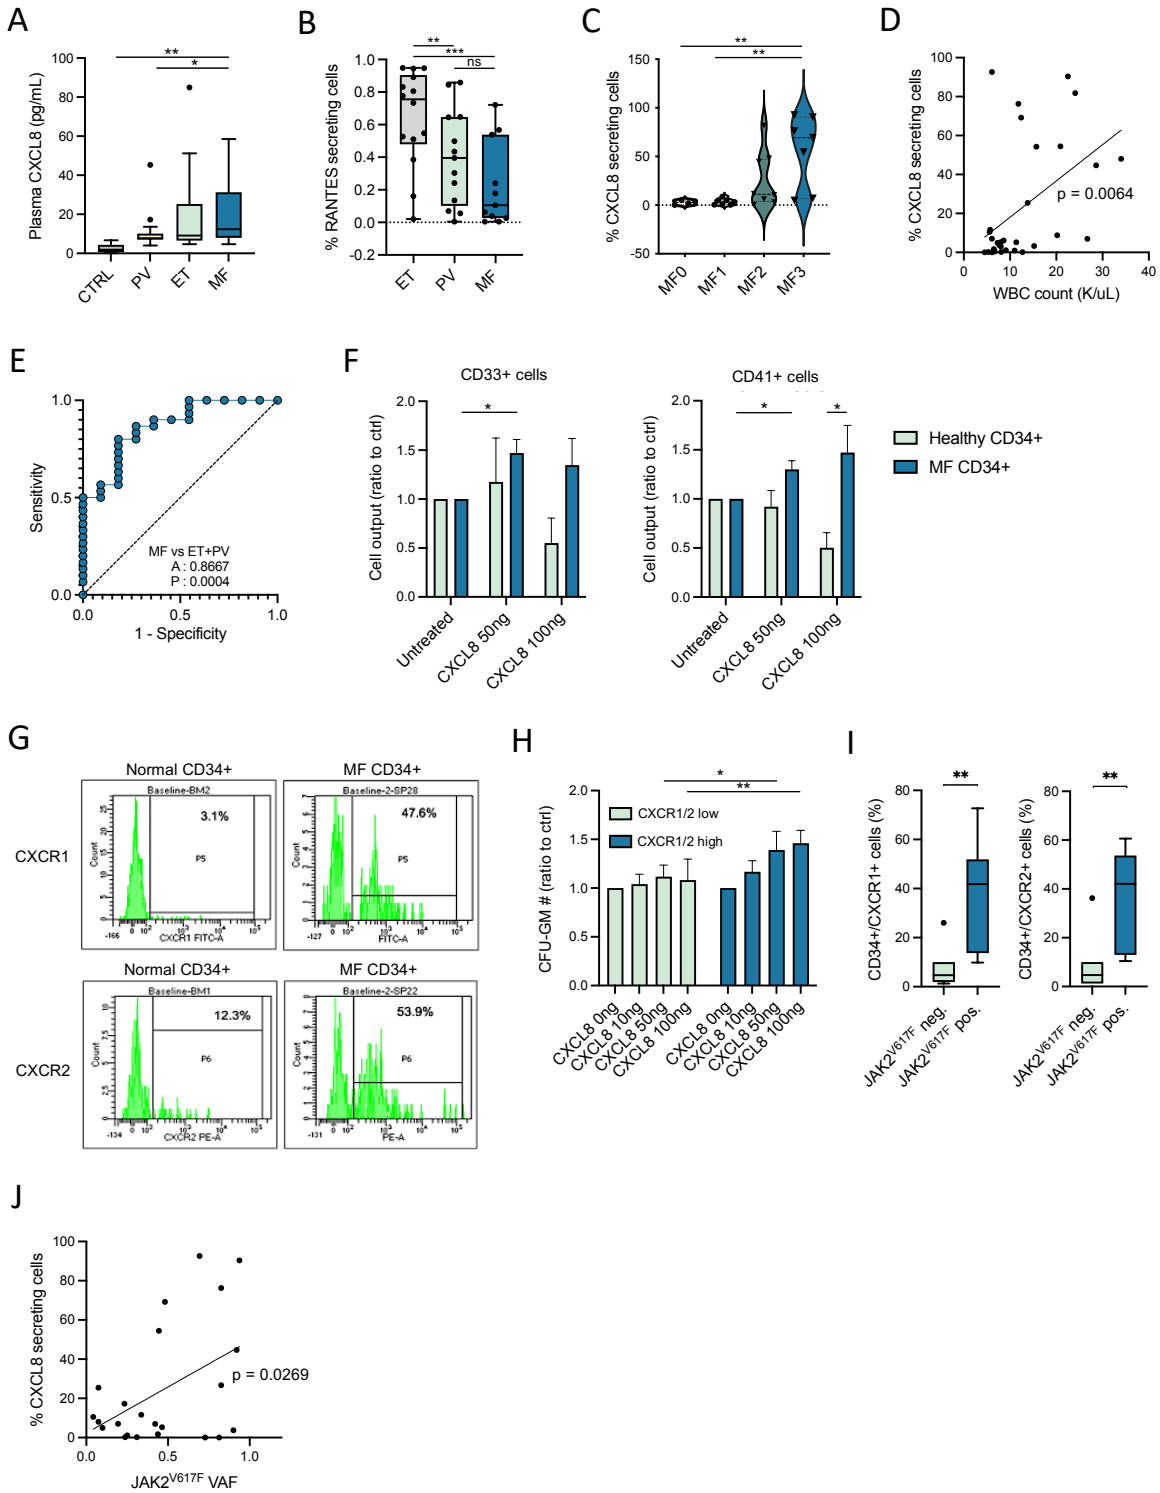

**Supplemental Figure 2: CXCL8 is aberrantly secreted by MF CD34+ cells and correlates with clinical parameters.** (A) CXCL8 levels as detected by ELISA in isolated plasma from PV, ET, and MF MPN patients in comparison to healthy controls (CTRL). (CTRL N=8, PV N=16, ET N=16, MF N=35). \* $p < 0.05$ , \*\* $p < 0.01$ . Data shown represent mean  $\pm$  SD. (B) Box plots depicting correlation between MPN sub-type and percent fraction of RANTES-only secreting cells as detected by single-cell cytokine analysis. \*\* $p < 0.01$ , \*\*\* $p < 0.001$ , ns=non-significant. (C) Violin plot depicting correlation between bone marrow reticulin score (MF0-3) of MF patients and percent fraction of detected CXCL8-only secreting cells by single-cell cytokine analysis (MF0 N=5, MF1 N=7, MF2 N=8, MF3 N=7). \*\* $p < 0.01$ . (D) Linear correlation analysis of percent fraction of CXCL8-only secreting CD34+ cells detected by single-cell cytokine analysis and total white blood cell (WBC) count at time of sample collection. (E) Receiver operator curve demonstrating association between percent CXCL8-only secreting cells and MF sub-type in comparison to PV/ET. A=area under the curve; P=p-value. (F) Ratio of total CD33+ cell output (left panel) and CD41+ cell output (right panel) relative to untreated of cultured healthy donor (light blue) vs. MF (dark blue) CD34+ cells in response to exogenous CXCL8 as detected by flow cytometry. Representative of duplicate experiments from 3 healthy donor (HD) and 6 individual MF cases. \* $p < 0.05$ . Data shown represent mean  $\pm$  SD. (G) Representative histograms demonstrating fraction and intensity of MF CD34+ cells expressing CXCR1/2 receptors. (H) Ratio of granulocyte-macrophage progenitor (CFU-GM) colony output to control of cultured MF CD34+ cells in methylcellulose in response to increasing doses of exogenous CXCL8 stratified by degree of CXCR1/2 surface expression (“low:”  $< 10\%$  of cells, light blue; “high:”  $\geq 10\%$  of cells, dark blue). Representative of duplicate experiments from 4 of individual MF cases with low-CXCR1/2 and 6 of individual MF cases with high-CXCR1/2. \* $p < 0.05$ , \*\* $p < 0.01$ . (I) Percentage of total MF CD34+ cells expressing CXCR1 (left panel) or CXCR2 (right panel) as detected by flow cytometry based on JAK2<sup>V617F</sup> mutational status of JAK2WT MF samples (light blue; N=5) vs. JAKV617F+ MF samples (dark blue; N=10). \*\* $p < 0.01$ . (J) Linear correlation analysis of percent fraction of CXCL8-only secreting CD34+ cells detected by single-cell cytokine analysis and associated JAK2<sup>V617F</sup> variant allele fraction (VAF) of bone marrow mononuclear cells at time of bone marrow biopsy.

# Supplemental Figure 3 – Extended RNA-Seq/ATAC-Seq patient data and publicly available MF gene expression dataset

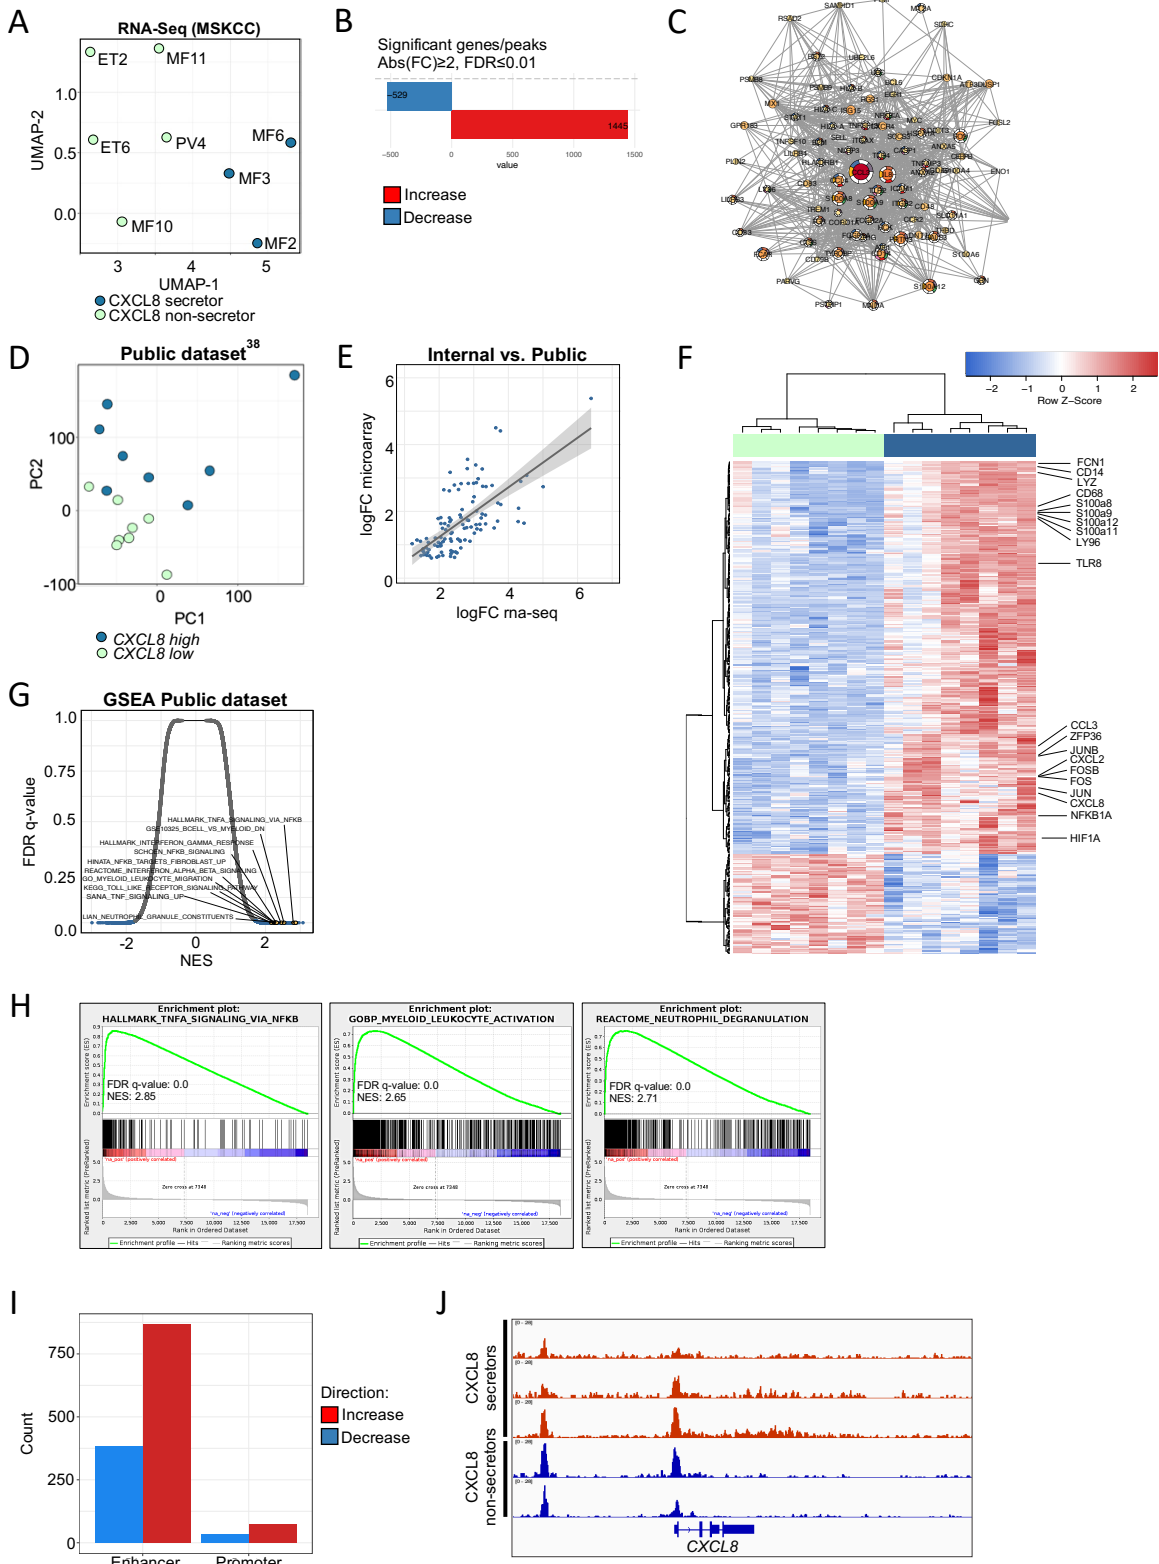

**Supplemental Figure 3: Extended RNA-Seq/ATAC-Seq patient data and publicly available MF gene expression dataset.** (A) Uniform manifold approximation and projection (UMAP) visualization of N=8 MPN patient samples (see Supp. Table S3) available for gene expression (RNA-Seq) analysis. Each dot represents an individual patient. Light blue represents CXCL8 “non-secretors;” dark blue represents CXCL8 “secretors” as identified by their single-cell cytokine secretion analysis. (B) Total number of differentially regulated genes (blue represents significantly down-regulated genes; red significantly up-regulated genes) of CXCL8 secretor vs. non-secretor MPN patients by a fold change cutoff of  $\pm 2$  and a FDR of 1%. (C) Graphical representation of optimized gene expression sub-network analysis from gene expression profiles showing key nodes enriched by RNA-Seq in CXCL8 secretor vs. non-secretor MPN patients. (D) PCA plot demonstrating clustering of myelofibrosis patients segregated by CXCL8 expression levels and stratified by <20% and >80% from a publicly available microarray gene expression data set.<sup>77</sup> Each dot represents an individual patient. Dark blue represents “CXCL8 high” (>80%) MF patients (N=8); light blue represents “CXCL8 low” (<20%) MF patients (N=8) as based on their relative CXCL8 expression level. (E) Correlation analysis comparing the internal (MSKCC) RNA-Seq dataset to the publicly-available MF gene expression data set. (F) Hierarchical clustering demonstrating differentially expressed genes in select MF patients stratified by CXCL8 expression level (light blue = CXCL8 low; dark blue = CXCL8 high). Blue, negative values; red, positive values. (G) Gene Set Enrichment Analysis (GSEA) demonstrating enriched pathways in “CXCL8 high” vs. “CXCL8 low” MF patients from the publicly-available dataset presented as normalized enrichment score (NES) by FDR q-value. N=8/arm. (H) Representative GSEA plots demonstrating positive enrichment in the pro-inflammatory Hallmark TNF $\alpha$  via NF- $\kappa$ B and mature leukocyte activation gene sets in CXCL8-high MF from the publicly-available dataset. (I) Total number of differential ATAC peaks segregating enhancers from promoter regions (defined as within 2kb of the transcription start site [TSS]) of CXCL8-high (N=3) vs. CXCL8-low (N=2) MPN patients. (J) Representative accessibility peaks at the CXCL8 locus extending from 6kb prior to the TSS to the 8kb beyond the 3'-UTR of CXCL8-secretor vs. non-secretor MPN patients.

**Supplemental Figure 4 – *Cxcr2*<sup>-/-</sup> knock-out validation, experimental set-up, and extended analysis of *VavCxcr2*<sup>-/-</sup> hMPL<sup>W515L</sup> mice**

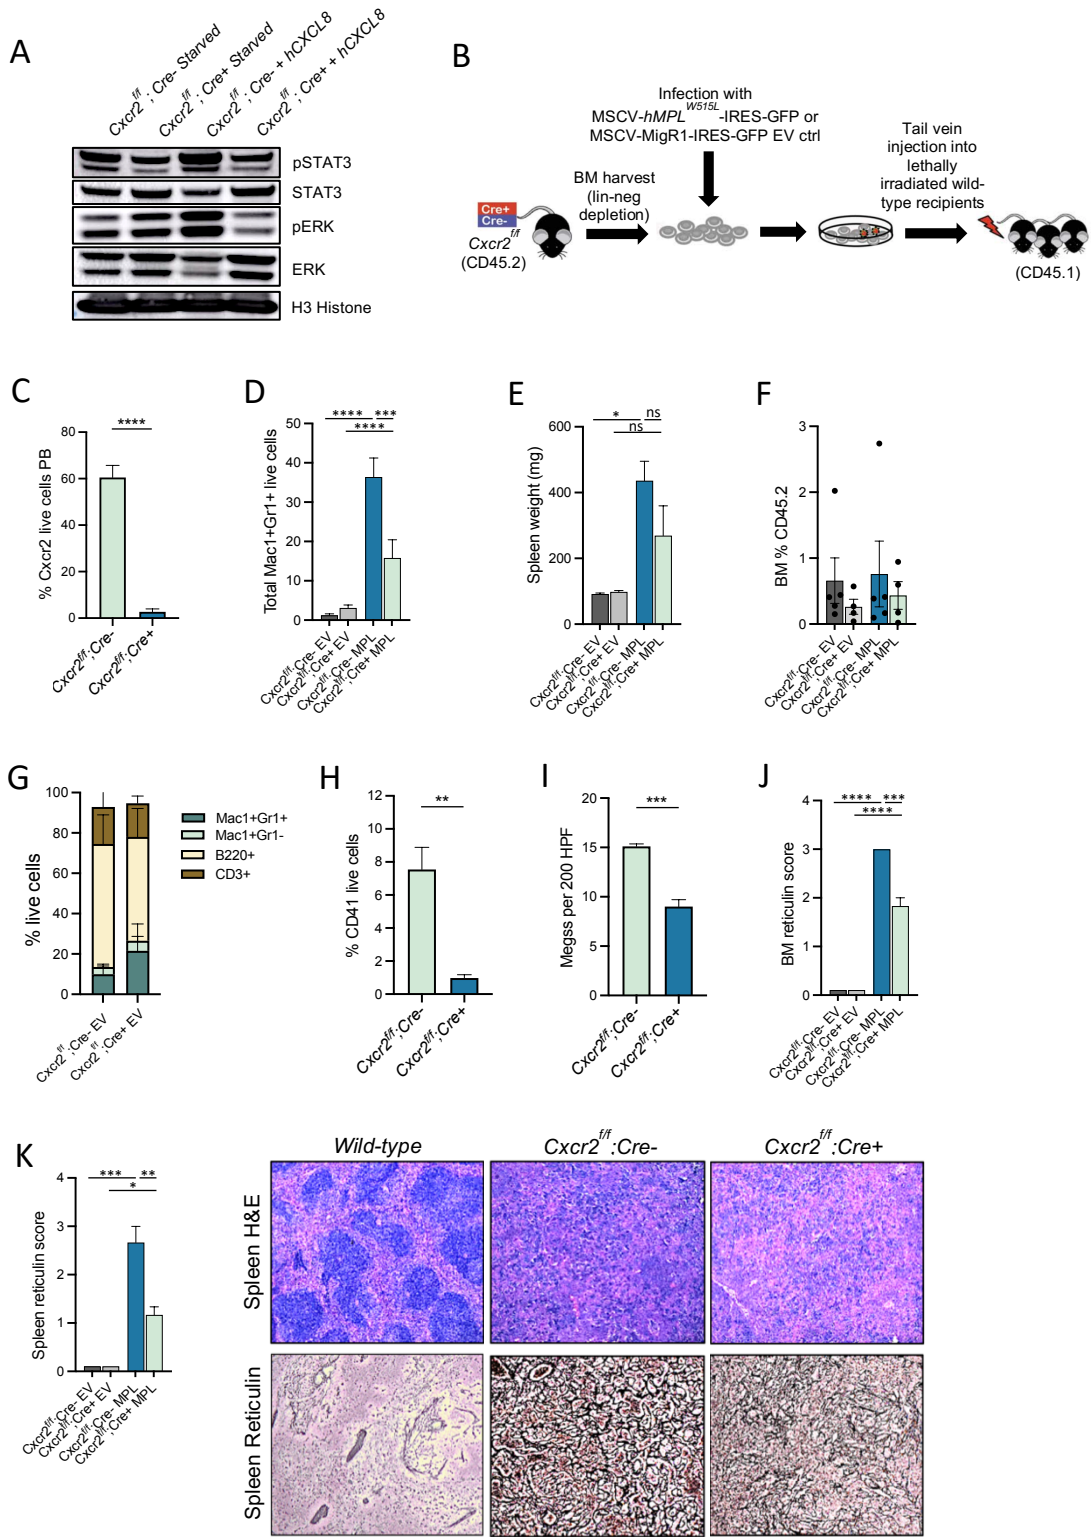

**Supplemental Figure 4: *Cxcr2*<sup>-/-</sup> knock-out validation, experimental set-up, and extended analysis of *Cxcr2*<sup>-/-</sup> hMPL<sup>W515L</sup> mice. (A)** Western blot analysis of canonical downstream *Cxcr2* mediators in harvested murine bone marrow after 2 hours cultured with or without exogenous human CXCL8 (hCXCL8) for both *Cxcr2*<sup>fl/fl</sup>;*Cre*<sup>-</sup> wild-type (WT) and *Cxcr2*<sup>fl/fl</sup>;*Cre*<sup>+</sup> knock-out (KO) cells. Representative blots of N=3 mice/arm. **(B)** Schematic of experimental set up of the *Cxcr2*<sup>-/-</sup> KO hMPL<sup>W515L</sup> transplant studies. BM=bone marrow, lin-neg=lineage-negative, EV ctrl=empty vector control. **(C)** Confirmation of *Cxcr2* loss on the surface of live peripheral blood (PB) mononuclear cells from *Cxcr2*<sup>fl/fl</sup>;*Cre*<sup>+</sup> primary KO mice. N=6/arm. \*\*\*\*p<0.0001. Unpaired t-test. Data shown represent mean ± SEM. **(D)** Absolute Mac1+Gr1+ mature neutrophil populations in peripheral blood of *Cxcr2*<sup>fl/fl</sup>;*Cre*<sup>+</sup> vs. *Cxcr2*<sup>fl/fl</sup>;*Cre*<sup>-</sup> hMPL<sup>W515L</sup> vs. empty vector (EV) transplanted mice at time of sacrifice. N=4-5 mice/arm. \*\*\*p<0.001, \*\*\*\*p<0.0001. Data shown represent mean ± SEM. Two-way ANOVA. **(E)** Spleen weights (mg) of *Cxcr2*<sup>fl/fl</sup>;*Cre*<sup>+</sup> KO vs. *Cxcr2*<sup>fl/fl</sup>;*Cre*<sup>-</sup> WT hMPL<sup>W515L</sup> or EV control mice. N=4-5 mice/arm. \*p<0.05, ns-non-significant. Data shown represent mean ± SEM. **(F)** Homing assay assessing frequency of donor CD45.2 mutant cells in bone marrow of lethally irradiated recipient mice 48 hours following transplant of *Cxcr2*<sup>fl/fl</sup>;*Cre*<sup>+</sup> KO vs. *Cxcr2*<sup>fl/fl</sup>;*Cre*<sup>-</sup> WT hMPL<sup>W515L</sup> or EV control cells. N=4-5 mice/arm. **(G)** Peripheral blood mature cell fractions of mice transplanted with *Cxcr2*<sup>fl/fl</sup>;*Cre*<sup>+</sup> KO vs. *Cxcr2*<sup>fl/fl</sup>;*Cre*<sup>-</sup> WT EV cells 9 weeks post-transplant. N=4-5 mice/arm. **(H)** Percent CD41+ live cells as detected by flow cytometry in bone marrow of *Cxcr2*<sup>fl/fl</sup>;*Cre*<sup>+</sup> vs. *Cxcr2*<sup>fl/fl</sup>;*Cre*<sup>-</sup> hMPL<sup>W515L</sup> transplanted mice at time of sacrifice 9 weeks post-transplant. N=4-6/arm. \*\*p<0.01. Unpaired t-test. Data shown represent mean ± SEM. **(I)** Recorded bone marrow megakaryocyte number (MKs) per high powered field (HPF) from *Cxcr2*<sup>fl/fl</sup>;*Cre*<sup>+</sup> KO vs. *Cxcr2*<sup>fl/fl</sup>;*Cre*<sup>-</sup> WT hMPL<sup>W515L</sup> transplanted mice. N=4-6/arm. \*\*\*p<0.001. **(J)** Bone marrow grade reticulin scores of *Cxcr2*<sup>fl/fl</sup>;*Cre*<sup>+</sup> vs. *Cxcr2*<sup>fl/fl</sup>;*Cre*<sup>-</sup> hMPL<sup>W515L</sup> or EV transplanted mice. N=4-6/arm. \*\*p<0.01. Two-way ANOVA. Data shown represent mean ± SEM. **(K)** Spleen grade reticulin scores (left) and representative hematoxylin and eosin (H&E) and reticulin images of spleen sections (right) from *Cxcr2*<sup>fl/fl</sup>;*Cre*<sup>+</sup> KO vs. *Cxcr2*<sup>fl/fl</sup>;*Cre*<sup>-</sup> WT hMPL<sup>W515L</sup> mice in comparison to wild-type. 20X magnification.



**Supplemental Figure 5 – Pharmacologic inhibition of CXCR1/2 improves hematologic parameters and reticulin fibrosis in the hMPL<sup>W515L</sup> adoptive transfer model of myelofibrosis**

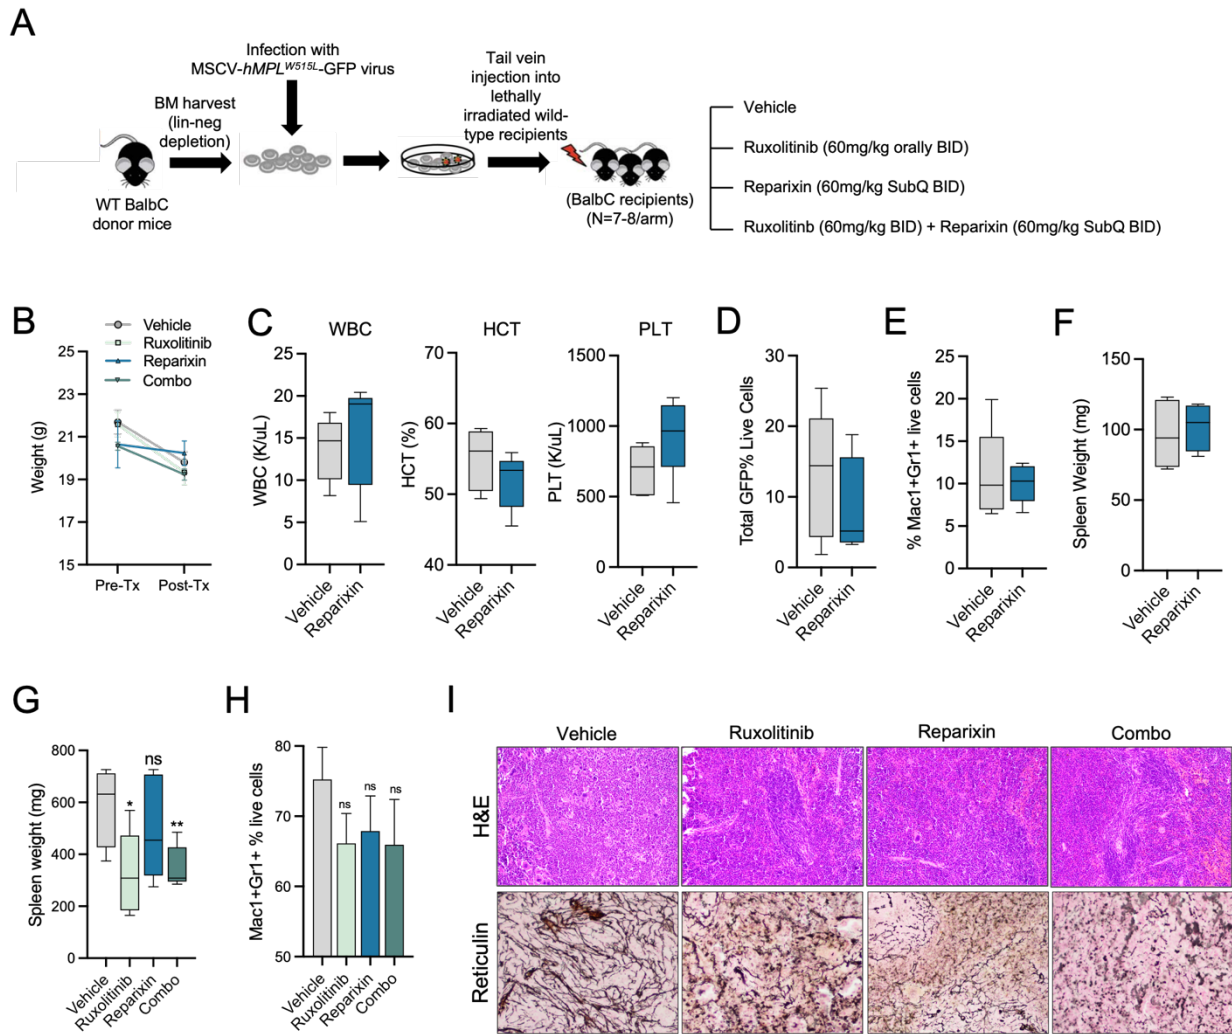

**Supplemental Figure 5: Pharmacologic inhibition of CXCR1/2 improves hematologic parameters and reticulin fibrosis in the hMPL<sup>W515L</sup> adoptive transfer model of myelofibrosis.** (A) Schematic of experimental outline for the reparixin/ruxolitinib *in vivo* drug trials. WT=wild-type, BM=bone marrow, lin-neg=lineage-negative. (B) Weights observed across treatment arms comparing the beginning and end of the 3-week trial period. N=6/arm. (C) White blood cell counts (WBC, K/uL), hematocrit levels (Hct, %), and platelet counts (PLT, K/uL), (D) % GFP fraction in peripheral blood, (E) % Mac1+Gr1+ fraction in peripheral blood, and (F) Spleen weights of lethally irradiated mice transplanted with wild-type MSCV-MigR1-IRES-GFP empty vector transfected bone marrow cells and treated with an identical dosing schedule and duration of reparixin (60mg/kg BID x21d) as hMPL<sup>W515L</sup> mice. N=5/arm. (G) Spleen weights (mg) of hMPL<sup>W515L</sup>-diseased mice treated with either vehicle, ruxolitinib, reparixin, or combination therapy. N=6/arm. \*p<0.05, \*\*p<0.01, ns=not significant. Data shown represent mean ± SEM. (H) Percentage of Mac1+Gr1+ neutrophil fractions in peripheral blood by flow cytometry of treated mice in comparison to vehicle at trial end point. ns=non-significant. Data shown represent mean ± SEM. (I) Representative H&E and reticulin images of hMPL<sup>W515L</sup>-diseased spleen treated with ruxolitinib, reparixin, or combination therapy compared with vehicle-treated hMPL<sup>W515L</sup> mice. N=6/arm. 20X magnification.

**Supplemental Figure 6 – CXCR1/2 inhibition demonstrates therapeutic efficacy in primary MF patient cells *in vitro*.**

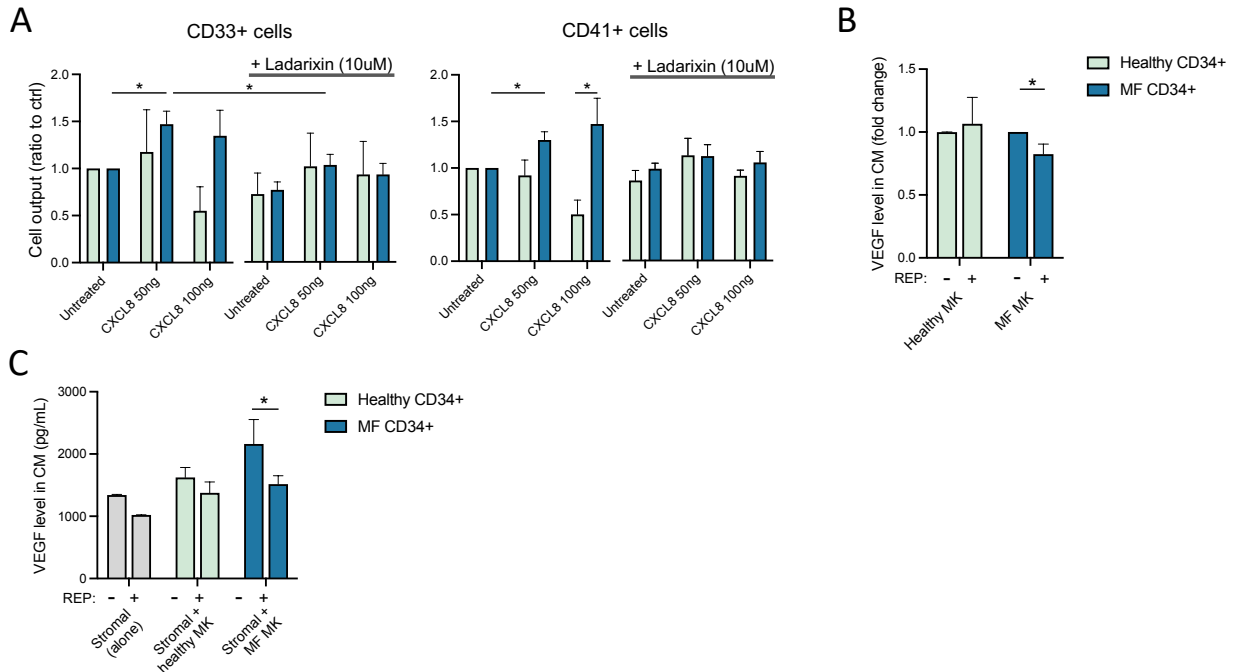

**Supplemental Figure 6: CXCR1/2 inhibition demonstrates therapeutic efficacy in primary MF patient cells *in vitro*.** (A) Ratio of total CD33+ cell (left) and CD41+ cell (right) output relative to untreated of cultured healthy donor (HD; light blue) vs. myelofibrosis (MF; dark blue) CD34+ cells in response to exogenous CXCL8 doses (50ng vs. 100ng) with or without the CXCR1/2 inhibitor Ladarixin (10uM). Representative of duplicate experiments from 3 healthy donor (HD) and 6 individual MF cases. \* $p < 0.05$ . Data shown represent mean  $\pm$  SD. (B) Fold-change in detectable VEGF levels in conditioned media (CM) elicited by either healthy donor vs. MF megakaryocytes (MKs) with or without the addition of reparixin (REP; 10uM). Representative of duplicate experiments from 3 healthy donor (HD) and 4 individual MF cases. \* $p < 0.05$ . Data shown represent mean  $\pm$  SD. (C) Total levels of VEGF in conditioned media (CM) of cultured stromal cells, either alone or together with healthy vs. MF MKs with or without the addition of reparixin (REP; 10uM). Representative of duplicate experiments from 3 healthy donor (HD) and 3 individual MF cases. \* $p < 0.05$ . Data shown represent mean  $\pm$  SD.

## SUPPLEMENTAL TABLES

**Supplemental Table 1 – Selected patients for single cell transcriptional (scRNA-Seq) analysis**

| ID             | Diagnosis                               | Age | Sex | Driver Mutation       | JAK2 <sup>V617F</sup> VAF | Grade reticulin fibrosis | Sequenced cell number (after filtration) | Sample Origin |
|----------------|-----------------------------------------|-----|-----|-----------------------|---------------------------|--------------------------|------------------------------------------|---------------|
| MF1            | Primary myelofibrosis                   | 76  | F   | JAK2 <sup>V617F</sup> | 82.5%                     | 3+/3                     | 801                                      | Patient Blood |
| PV1            | Polycythemia vera                       | 59  | F   | JAK2 <sup>V617F</sup> | 69.4%                     | 0-1+/3                   | 892                                      | Patient Blood |
| PV2            | Polycythemia vera                       | 41  | M   | JAK2 <sup>V617F</sup> | 14.2%                     | 1-2+/3                   | 772                                      | Patient Blood |
| PV3            | Polycythemia vera                       | 46  | M   | JAK2 <sup>V617F</sup> | 25.1%                     | 0/3                      | 700                                      | Patient Blood |
| ET1            | Essential thrombocythemia               | 74  | F   | Triple neg.           | N/A                       | 1+/3                     | 532                                      | Patient Blood |
| ET2            | Essential thrombocythemia               | 40  | M   | CALR                  | N/A                       | 0-1+/3                   | 505                                      | Patient Blood |
| ET3 (ET w/ MF) | Essential thrombocythemia with fibrosis | 73  | M   | JAK2 <sup>V617F</sup> | 7.6%                      | 2+/3                     | 997                                      | Patient Blood |

MF: myelofibrosis; PV: polycythemia vera; ET: essential thrombocythemia; VAF: variant allele fraction

**Supplemental Table 2 – Selected patients for single-cell cytokine analysis**

| ID   | Diagnosis | Age | Sex | Driver mutation       | Grade reticulin fibrosis | % CXCL8 secreting CD34+ cells |
|------|-----------|-----|-----|-----------------------|--------------------------|-------------------------------|
| MF1  | PMF       | 76  | F   | JAK2 <sup>V617F</sup> | 3+/3                     | 44.74                         |
| MF2  | PMF       | 74  | F   | JAK2 <sup>V617F</sup> | 2-3/3                    | 81.79                         |
| MF3  | PV to MF  | 67  | F   | JAK2 <sup>V617F</sup> | 3+/3                     | 92.63                         |
| MF4  | ET to MF  | 53  | F   | JAK2 <sup>V617F</sup> | 3+/3                     | 69.22                         |
| MF5  | PMF       | 68  | M   | CALR                  | 2-3/3                    | 76.32                         |
| MF6  | PMF       | 72  | M   | MPL                   | 3+/3                     | 90.38                         |
| MF7  | ET to MF  | 72  | F   | CALR                  | 3+/3                     | 4.67                          |
| MF8  | PMF       | 81  | M   | JAK2 <sup>V617F</sup> | 1+/3                     | 8.79                          |
| MF9  | PMF       | 64  | F   | JAK2 <sup>V617F</sup> | 2+/3                     | 17.31                         |
| MF10 | ET to MF  | 67  | F   | MPL                   | 1-2+/3                   | 18.0                          |
| MF11 | PV to MF  | 75  | M   | JAK2 <sup>V617F</sup> | 2-3+/3                   | 6.98                          |
| PV1  | PV        | 59  | F   | JAK2 <sup>V617F</sup> | 0-1+/3                   | 25.49                         |
| PV2  | PV        | 41  | M   | JAK2 <sup>V617F</sup> | 1-2+/3                   | 1.38                          |
| PV3  | PV        | 46  | M   | JAK2 <sup>V617F</sup> | 0/3                      | 2.66                          |
| PV4  | PV        | 70  | M   | JAK2 <sup>V617F</sup> | 1-2+/3                   | 3.30                          |
| PV5  | PV        | 63  | F   | JAK2 <sup>V617F</sup> | 2-3+/3                   | 54.46                         |
| PV6  | PV        | 57  | M   | JAK2 <sup>V617F</sup> | 2+/3                     | 48.05                         |
| PV7  | PV        | 71  | M   | JAK2 <sup>V617F</sup> | 1-2+/3                   | 11.62                         |
| PV8  | PV        | 66  | M   | JAK2 <sup>V617F</sup> | NA                       | 54.27                         |
| PV9  | PV        | 50  | M   | JAK2 <sup>V617F</sup> | 1-2+/3                   | 6.15                          |
| PV10 | PV        | 84  | F   | JAK2 <sup>V617F</sup> | NA                       | 1.09                          |
| PV11 | PV        | 70  | F   | JAK2 <sup>V617F</sup> | NA                       | 8.06                          |
| PV12 | PV        | 69  | M   | JAK2 <sup>V617F</sup> | 1+/3                     | 5.25                          |
| PV13 | PV        | 62  | F   | JAK2 <sup>V617F</sup> | NA                       | 7.07                          |
| ET1  | ET        | 74  | F   | Tripe neg.            | 1+/3                     | 1.68                          |
| ET2  | ET        | 40  | M   | CALR                  | 0-1+/3                   | 3.71                          |
| ET3  | ET        | 73  | M   | JAK2 <sup>V617F</sup> | 2+/3                     | 14.6                          |
| ET4  | ET        | 51  | F   | JAK2 <sup>V617F</sup> | 1+/3                     | 0.18                          |
| ET5  | ET        | 75  | M   | JAK2 <sup>V617F</sup> | 0+/3                     | 0.44                          |
| ET6  | ET        | 73  | M   | MPL                   | 1+/3                     | 0.85                          |
| ET7  | ET        | 49  | M   | JAK2 <sup>V617F</sup> | 0-1/3                    | 0.16                          |
| ET8  | ET        | 71  | F   | JAK2 <sup>V617F</sup> | 1-2/3                    | 10.55                         |
| ET9  | ET        | 73  | F   | CALR                  | 1+/3                     | 4.92                          |
| ET10 | ET        | 72  | F   | JAK2 <sup>V617F</sup> | N/A                      | 0                             |
| ET11 | ET        | 72  | F   | JAK2 <sup>V617F</sup> | 0/3                      | 5.29                          |
| ET12 | ET        | 72  | F   | Triple neg.           | 1+/3                     | 0.18                          |
| ET13 | ET        | 61  | F   | JAK2 <sup>V617F</sup> | 1-2+/3                   | 0                             |
| ET14 | ET        | 66  | M   | JAK2 <sup>V617F</sup> | 1+/3                     | 0.93                          |

PMF: primary myelofibrosis; PV: polycythemia vera; ET: essential thrombocythemia

**Supplemental Table 3 – Selected patients for bulk RNA-Seq (+ ATAC-Seq) analysis**

| ID                         | Diagnosis | Age | Sex | Driver mutation       | JAK2 <sup>V617F</sup> VAF | Grade reticulin fibrosis | %CXCL8 secreting CD34+ cells | Sample Origin |
|----------------------------|-----------|-----|-----|-----------------------|---------------------------|--------------------------|------------------------------|---------------|
| <b>CXCL8 secretors</b>     |           |     |     |                       |                           |                          |                              |               |
| MF2*                       | PMF       | 74  | F   | JAK2 <sup>V617F</sup> | N/A                       | 2-3+                     | 81.79%                       | Patient Blood |
| MF3*                       | PV to MF  | 67  | F   | JAK2 <sup>V617F</sup> | 0.69                      | 3+/3                     | 92.63%                       | Patient Blood |
| MF6*                       | PMF       | 72  | M   | MPL                   | 0.94                      | 3+/3                     | 90.38%                       | Patient Blood |
| <b>CXCL8 non-secretors</b> |           |     |     |                       |                           |                          |                              |               |
| MF10                       | ET to MF  | 67  | F   | MPL                   | 0.24                      | 1-2/+3 to 3+/3           | 18.0%                        | Patient Blood |
| MF11                       | PV to MF  | 75  | M   | JAK2 <sup>V617F</sup> | 0.42                      | 2-3+/3                   | 6.98%                        | Patient Blood |
| PV4*                       | PV        | 70  | M   | JAK2 <sup>V617F</sup> | N/A                       | 1+, focal 2+/3           | 3.30%                        | Patient Blood |
| ET2*                       | ET        | 40  | M   | CALR                  | 0.9                       | 0-1+/3                   | 3.71%                        | Patient Blood |
| ET6                        | ET        | 73  | M   | MPL                   | 0.24                      | 1+/3                     | 0.85%                        | Patient Blood |

MF: primary myelofibrosis; PV: polycythemia vera; ET: essential thrombocythemia. VAF: variant allele  
 \*Denotes patients on whom integrated RNA-Seq/ATAC-Seq analysis was performed
